# Supplementary material for: Large-scale synthesis of porous Ni2P nanosheets for lithium secondary batteries
Source: Royal Society of Chemistry journal article supplement (doi:10.1039/c2ce26378e), 2012-01-01
Supplement: c2ce26378e.pdf [file c2ce26378e.pdf]

# Supporting Information

## Large-scale synthesis of porous Ni<sub>2</sub>P nanosheets for lithium secondary batteries

Yi Lu,<sup>a</sup> Jiang-ping Tu,<sup>\*a</sup> Qin-qin Xiong,<sup>a</sup> Heng Zhang,<sup>a</sup> Chang-dong Gu,<sup>a</sup> Xiu-li Wang,<sup>a</sup> and Scott X.

Mao<sup>b</sup>

<sup>a</sup> *State Key Laboratory of Silicon Materials, Key Laboratory of Advanced Materials and Applications for Batteries of Zhejiang Province and Department of Materials Science and Engineering, Zhejiang University, Hangzhou 310027, China*

<sup>b</sup> *Department of Mechanical Engineering and Materials Science, University of Pittsburgh, Pittsburgh, Pennsylvania 15261, USA*

\*Corresponding author. E-mail: [tujp@zju.edu.cn](mailto:tujp@zju.edu.cn); [tujplab@zju.edu.cn](mailto:tujplab@zju.edu.cn) (Jiang-ping Tu)

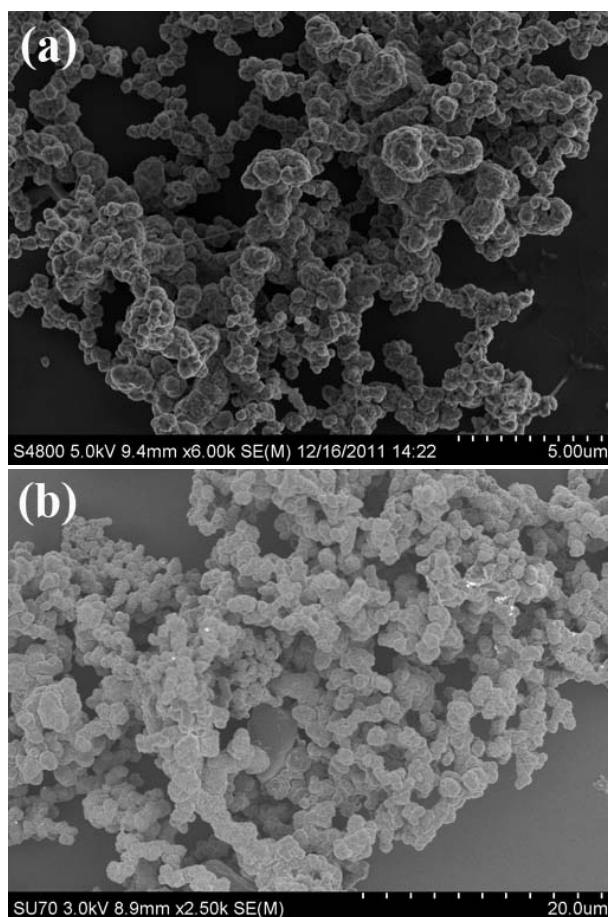

**Fig. S1** (a) SEM image of Ni spheres synthesized without using SDBS; (b) SEM image of Ni<sub>2</sub>P/Ni<sub>12</sub>P<sub>5</sub> spheres.

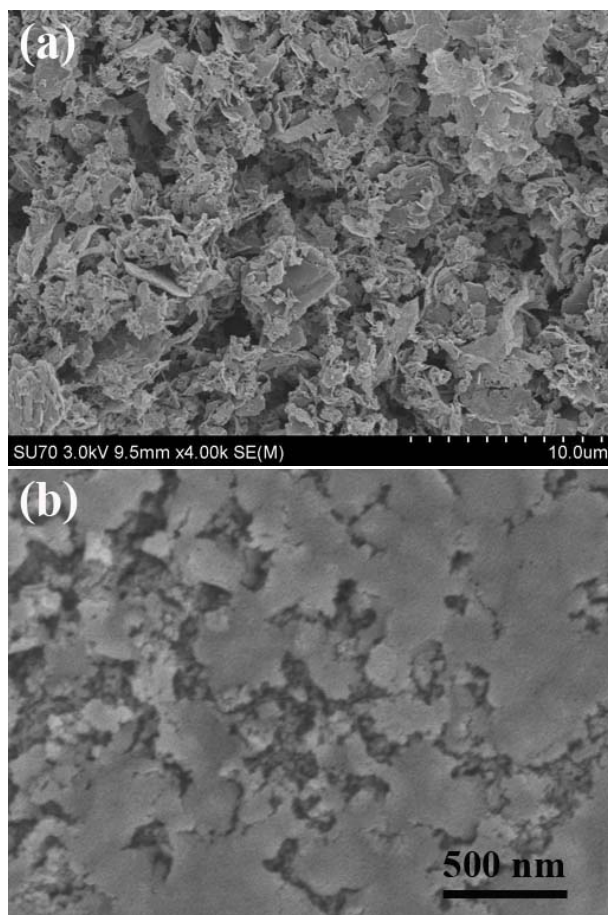

**Fig. S2** (a) SEM image of Ni<sub>2</sub>P nanosheets after 20 cycles; (b) SEM image of Ni<sub>2</sub>P nanoparticles after 20 cycles.
